# Supplementary material
Source: publisher figshare collection journal article supplement (https://gsajournals.figshare.com/ndownloader/files/25800092)
Supplement: Supplementary file 1 [file 25800092]

## Sheet: Cl2
	#	Motif collection	Description	Possible Transcription Factor	Possible Transcription factor - Full Name	NES	Cluster	Exp post MF Eye diff°	Neurogenesis	Other	Unknown
NES>6	1	taipale-NNAAAATCRATAWN-ONECUT2-DBD	NNAAAATCRATAWN-ONECUT2-DBD	ct	cut	6.07458	5
	2	taipale-NNAAAATCRATANN-ONECUT3-DBD	NNAAAATCRATANN-ONECUT3-DBD	onecut, ct	onecut	5.84847	2
					cut
	3	taipale-NNAAAATCRATAWN-ONECUT1-full	NNAAAATCRATAWN-ONECUT1-full	ct	cut	5.69259
	4	taipale-NNAAAATCRATAWN-ONECUT1-DBD	NNAAAATCRATAWN-ONECUT1-DBD	onecut, ct	onecut	5.55378
NES>5					cut
	5	swissregulon-ONECUT1-2.p2	ONECUT2, ONECUT1	onecut	onecut	4.25036
	6	elemento-AGAGAGAG	AGAGAGAG			4.16418
	7	flyfactorsurvey-gl_SANGER_5_FBgn0004618	FBgn0004618(gl)	gl	glass	4.13651	2
NES>4	8	encode-UW.Motif.0053	UW.Motif.0053			4.09
	9	elemento-CTCTCTC	CTCTCTC			3.98637
	10	stark-GAGAGAG	GAGAGAG			3.98637
	11	flyfactorsurvey-gl_SOLEXA_5_FBgn0004618	FBgn0004618(gl)	gl	glass	3.87199
	12	yetfasco-1012	MATA1			3.74524
	13	tiffin-TIFDMEM0000009	TIFDMEM0000009	Trl, CG33260	trident	3.70544	-
					CG33260		11
	14	homer-M00223	SeqBias:			3.5854
	15	yetfasco-1750	YPR199C			3.48796
	16	yetfasco-1744	YLR131C			3.4678
	17	jaspar-MA0039.1	Klf4			3.43961
	18	transfac_pro-M01216	V$FOXO1_Q5	slp1, slp2, foxo	sloppy paired 1	3.4149	2
					sloppy paired 2		2
					forkhead box, sub-group O		10
	19	homer-M00218	SeqBias:	rn, pdm3, CG3407, fru, peb	rotund	3.38888	9
					pou domain motif 3		5
					CG3407		4
					fruitless		7
					pebbled		2
	20	factorbook-TCF12	TCF12	ac, ase, ato, crp, da, amos, l(1)sc, nau, sc, cato	achaete	3.36285	3
					asense		3
					atonal		4
					cropped		9
					daughterless		9
					absent MD neurons and olfactory sensilla		1
					lethal of scute		1
					nautilus (MyoD)		6
					scute		3
					cousin of atonal		3
	21	elemento-ACACACAC	ACACACAC			3.35304
	22	homer-M00424	pan/dmmpmm(Down)/fly	pan	pangolin	3.34915	4
	23	transfac_pro-M02864	V$GM497_04			3.33413
	24	homer-M00263	GAGA-repeat/SacCer-Promoters/Homer	Trl, CG33260	trident	3.30718
					CG33260
	25	yetfasco-1444	YDL056W			3.27898
	26	yetfasco-1222	YLR451W			3.27345
	27	elemento-CACGCAC	CACGCAC			3.26265
	28	yetfasco-1189	YLR098C			3.24249
	29	homer-M00242	GAGA-repeat/Arabidopsis-Promoters/Homer			3.23728
	30	jaspar-PF0016.1	RYTTCCTG	Ets65A, Eip74EF, aop	Ets at 65A	3.23017	-
					Ecdysone-induced protein 74EF		8
					anterior open		2
	31	yetfasco-1191	YPL177C			3.20809
	32	transfac_pro-M02092	V$EGR2_Q6	sr	stripe	3.17693	8
	33	yetfasco-1206	YER040W			3.17568
	34	yetfasco-1374	YDR253C			3.149
	35	yetfasco-1370	YPL038W			3.14834
	36	stark-ACACNNNNRCAC	ACACNNNNRCAC			3.14425
	37	yetfasco-1260	YMR016C			3.13905
	38	tfdimers-MD00558	POU5F1_FAC1	rn, E(bx)	rotund	3.11698
					Enhancer of bithorax		9
	39	transfac_public-M00148	V$SRY_01	SoxN	SoxNeuro	3.11342	2
	40	stark-ACACNNACAC	ACACNNACAC			3.10262
	41	elemento-ACGCACAC	ACGCACAC			3.10169
	42	yetfasco-1308	YNL216W			3.09741
	43	tfdimers-MD00532	FOXO1_POU5F1	slp1, fkh, slp2, foxo	sloppy paired 1	3.09016
					fork head		5
					sloppy paired 2
					forkhead box, sub-group O
	44	encode-UW.Motif.0011	UW.Motif.0011			3.08885
	45	transfac_pro-M02100	V$MYOD_Q6_02	ac, ase, CG34422, da, sc, l(1)sc, nau, amos	achaete	3.08463
					asense
					hat-trick		10
					daughterless
					scute
					lethal of scute
					nautilus (MyoD)
					absent MD neurons and olfactory sensilla
	46	transfac_pro-M00639	V$HNF6_Q6	onecut	onecut	3.07732
	47	swissregulon-BPTF.p2	BPTF	E(bx)	Enhancer of bithorax	3.0596
	48	stark-RCACNNNNNNNCACA	RCACNNNNNNNCACA			3.0538
	49	transfac_pro-M01688	F$MET31_01			3.0428
	50	tfdimers-MD00525	GR_SMAD1			3.03799
	51	yetfasco-1238	YGL013C			3.03285
	52	stark-CACRCAC	CACRCAC			3.02606
	53	wolfe-gl_SOLEXA_F3-5	gl(FBgn0004618)			3.02264
	54	encode-UW.Motif.0277	UW.Motif.0277			3.01526
NES>3	55	taipale-TTACGYAM-GMEB2-DBD	TTACGYAM-GMEB2-DBD			3.01282

## Sheet: Cl7
	#	Motif collection	Description	Possible Transcription Factor	Possible Transcription factor - Full Name	NES	Cluster	Proliferation	Eye diff° Neurogenesis	Other	Unknown
	1	flyfactorsurvey-lola_SANGER_5_FBgn0005630	FBgn0005630(lola)	lola	longitudinals lacking	5.64106	4
	2	selexconsensus-Dref	Dref	Dref	DNA replication-related element factor	5.37361	7
	3	flyfactorsurvey-lola_SOLEXA_5_FBgn0005630	FBgn0005630(lola)	lola	longitudinals lacking	5.26313
	4	elemento-TATCGATA	TATCGATA	Dref	DNA replication-related element factor	5.25345
NES>5
	5	flyfactorsurvey-lola-PG_SOLEXA_FBgn0005630	FBgn0005630(lola)	lola	longitudinals lacking	4.99261
	6	homer-M00232	Unknown1(NR/Ini-like)/Drosophila-Promoters/Homer			4.89844
	7	jaspar-PF0002.1	CACGTG	Usf, Max, tgo, cyc, HLH106, Mitf, tai, Atf3	Usf	4.8773	7
					Max		7
					tango		4
					cycle		4
					Sterol regulatory element binding protein		10
					Mitf		11
					taiman		6
					Activating transcription factor 3		7
	8	taipale-AWCAGCTGWT-TFAP4-full	AWCAGCTGWT-TFAP4-full	crp	cropped	4.87524	9
	9	taipale-AWCAGCTGWT-TFAP4-DBD	AWCAGCTGWT-TFAP4-DBD	crp	cropped	4.80131
	10	tiffin-TIFDMEM0000079	TIFDMEM0000079			4.77611
	11	tiffin-TIFDMEM0000116	TIFDMEM0000116			4.77105
	12	homer-M00098	JunD(bZIP)/K562-JunD-ChIP-Seq/Homer	Atf-2, Atf3, Jra, CrebB-17A	Activating transcription factor-2	4.74429	2
					Activating transcription factor 3
					Jun-related antigen		3
					Cyclic-AMP response element binding protein B		10
	13	yetfasco-443	YJR060W	Usf, Max, tgo, cyc, HLH106, Mitf, tai, Atf3	Usf	4.68321
					Max
					tango
					cycle
					HLH106		10
					Mitf
					taiman
					Activating transcription factor 3
	14	taipale-NATGACGTCAYN-JDP2-full	NATGACGTCAYN-JDP2-full	Atf-2, Jra, Atf3, CrebB-17A	Activating transcription factor-2	4.64238
					Jun-related antigen
					Activating transcription factor 3
					Cyclic-AMP response element binding protein B
	15	taipale-NATGACGTCAYN-JDP2-DBD	NATGACGTCAYN-JDP2-DBD	Atf-2, Jra, Atf3, CrebB-17A	Activating transcription factor-2	4.55721
					Jun-related antigen
					Activating transcription factor 3
					Cyclic-AMP response element binding protein B
	16	transfac_pro-M03119	N$HLH11_01			4.55527
	17	taipale-NATGACGTCAYN-Jdp2-DBD	NATGACGTCAYN-Jdp2-DBD	Atf-2, Jra, Atf3, CrebB-17A	Activating transcription factor-2	4.52161
					Jun-related antigen
					Activating transcription factor 3
					Cyclic-AMP response element binding protein B
	18	homer-M00230	DREF/Drosophila-Promoters/Homer	Dref	DNA replication-related element factor	4.51104
	19	homer-M00097	c-Jun-CRE(bZIP)/K562-cJun-ChIP-Seq/Homer	Atf-2, Atf3, Jra, CrebB-17A	Activating transcription factor-2	4.50865
					Activating transcription factor 3
					Jun-related antigen
					Cyclic-AMP response element binding protein B
	20	flyfactorsurvey-crp_SANGER_10_FBgn0001994	FBgn0001994(crp)	crp	cropped	4.38121
	21	transfac_pro-M02772	V$JUNDM2_03	Atf6, Atf-2, Jra, Atf3, CrebB-17A	Atf6	4.3505	8
					Activating transcription factor-2
					Jun-related antigen
					Activating transcription factor 3
					Cyclic-AMP response element binding protein B
	22	taipale-NATGACGTCAYN-Creb5-DBD	NATGACGTCAYN-Creb5-DBD	Atf-2, Jra, Atf3, CrebB-17A	Activating transcription factor-2	4.2971
					Jun-related antigen
					Activating transcription factor 3
					Cyclic-AMP response element binding protein B
	23	factorbook-v-JUN	v-JUN	Atf-2, Atf3, Jra, CrebB-17A	Activating transcription factor-2	4.23747
					Activating transcription factor 3
					Jun-related antigen
					Cyclic-AMP response element binding protein B
	24	tiffin-TIFDMEM0000042	TIFDMEM0000042			4.22918
	25	tiffin-TIFDMEM0000074	TIFDMEM0000074			4.22912
	26	homer-M00597	BEAF-32/dmmpmm(Pollard)/fly	Dref	DNA replication-related element factor	4.20709
	27	yetfasco-2075	YIL036W	Atf6, Atf-2, Jra, Atf3, CrebB-17A	Atf6	4.15013
					Activating transcription factor-2
					Jun-related antigen
					Activating transcription factor 3
					Cyclic-AMP response element binding protein B
	28	transfac_pro-M00488	I$DREF_Q3	Dref	DNA replication-related element factor	4.09929
	29	yetfasco-2051	YFR034C	Met, Max	Methoprene-tolerant	4.06307	4
					Max
	30	transfac_pro-M02488	F$RLM1_02	Mef2	Myocyte enhancer factor 2	4.05868	7
	31	yetfasco-1501	YPL089C	Mef2	Myocyte enhancer factor 2	4.02586
NES>4	32	yetfasco-1428	YPL089C	Mef2	Myocyte enhancer factor 2	4.02497
	33	tiffin-TIFDMEM0000005	TIFDMEM0000005	Dref	DNA replication-related element factor	3.9892
	34	homer-M00676	Dref/dmmpmm(SeSiMCMC)/fly	Dref	DNA replication-related element factor	3.94737
	35	jaspar-MA0004.1	Arnt	Met, Max, tgo, Atf3, Usf	Methoprene-tolerant	3.9452
					Max
					tango
					Activating transcription factor 3
					Usf
	36	jaspar-PF0009.1	TGAYRTCA	Atf3, Jra, CrebB-17A	Activating transcription factor 3	3.93947
					Jun-related antigen
					Cyclic-AMP response element binding protein B
	37	yetfasco-1389	YFR034C			3.8968
	38	transfac_public-M00036	V$VJUN_01	Atf-2, Jra, Atf3, CrebB-17A	Activating transcription factor-2	3.86654
					Jun-related antigen
					Activating transcription factor 3
					Cyclic-AMP response element binding protein B
	39	taipale-NNATGACGTCATNN-ATF7-DBD	NNATGACGTCATNN-ATF7-DBD	Atf-2, Jra, Atf3, CrebB-17A	Activating transcription factor-2	3.8493
					Jun-related antigen
					Activating transcription factor 3
					Cyclic-AMP response element binding protein B
	40	yetfasco-1465	YHR206W			3.83511
	41	flyfactorsurvey-Cf2-PB_SOLEXA_FBgn0000286	FBgn0000286(Cf2)	Cf2	Chorion factor 2	3.8281	4
	42	homer-M00231	E-box/Drosophila-Promoters/Homer	amos, crp, nau	absent MD neurons and olfactory sensilla	3.73776	1
					cropped
					nautilus (MyoD)		6
	43	yetfasco-1390	YFR034C	Max, tgo	Max	3.73315
					tango
	44	taipale-NCTAWAAATAGM-MEF2D-DBD	NCTAWAAATAGM-MEF2D-DBD	Mef2	Myocyte enhancer factor 2	3.73309
	45	jaspar-PB0043.1	Max_1	Max, da, Mnt, tgo, Usf	Max	3.73148
					daughterless		9
					Mnt		3
					tango
	46	hdpi-USF2	USF2	Usf	Usf	3.71907
	47	transfac_public-M00012	I$CF2II_01	Cf2	Chorion factor 2	3.71173
	48	yetfasco-1448	YBR182C			3.70294
	49	jaspar-MA0015.1	Cf2_II	Cf2	Chorion factor 2	3.68325
	50	tiffin-TIFDMEM0000034	TIFDMEM0000034			3.6823
	51	yetfasco-580	YDR303C			3.65627
	52	transfac_pro-M00799	V$MYC_Q2	Max, tgo	Max	3.6467
					tango
	53	taipale-KCTAWAAATAGM-MEF2A-DBD	KCTAWAAATAGM-MEF2A-DBD	Mef2	Myocyte enhancer factor 2	3.61722
	54	swissregulon-JUN.p2	JUN, JUND, JUNB	Atf3, Jra, CrebB-17A	Activating transcription factor 3	3.60392
					Jun-related antigen
					Cyclic-AMP response element binding protein B
	55	elemento-ACACGTG	ACACGTG	tai	taiman	3.59091
	56	yetfasco-247	YFR034C			3.58863
	57	homer-M00236	Unknown3/Drosophila-Promoters/Homer			3.56142
	58	yetfasco-297	YNL167C	Atf-2, Atf3, Jra, CrebB-17A	Activating transcription factor-2	3.55703
					Activating transcription factor 3
					Jun-related antigen
					Cyclic-AMP response element binding protein B
	59	taipale-RCTAWAAATAGM-MEF2B-full	RCTAWAAATAGM-MEF2B-full	Mef2	Myocyte enhancer factor 2	3.55608
	60	homer-M01514	PHO4/PHO4_Pi-/38-PHO4(Harbison)/Yeast	Max, gce, Mnt, Usf	Max	3.54245
					germ cell-expressed bHLH-PAS		7
					Mnt
					Usf
	61	swissregulon-FOXL1.p2	FOXL1	bin	biniou	3.54201	-
	62	stark-RTATATRTRB	RTATATRTRB(Cf2)	Cf2	Chorion factor 2	3.50274
	63	yetfasco-1456	YER040W			3.50196
	64	taipale-NACACGTGTN-CLOCK-DBD	NACACGTGTN-CLOCK-DBD	Max	Max	3.48977
	65	homer-M00235	Unknown2/Drosophila-Promoters/Homer			3.47971
	66	transfac_public-M00013	I$CF2II_02	Cf2	Chorion factor 2	3.47509
	67	jaspar-MA0104.1	Mycn	Usf, E(spl)m8-HLH, Max, tgo, cyc, HLH106, Mitf, tai, Atf3	Usf	3.47242
					Enhancer of split m8, helix-loop-helix		3
					Max
					tango
					cycle
					HLH106
					Mitf
					taiman
					Activating transcription factor 3
	68	transfac_public-M00231	V$MEF2_02	Mef2	Myocyte enhancer factor 2	3.45072
	69	homer-M00008	Atf1(bZIP)/K562-ATF1-ChIP-Seq(GSE31477)/Homer	Atf6, Atf-2, Jra, Atf3, CrebB-17A	Atf6	3.44449
					Activating transcription factor-2
					Jun-related antigen
					Activating transcription factor 3
					Cyclic-AMP response element binding protein B
	70	transfac_pro-M02738	V$ATF1_03	Atf6, Atf-2, Jra, Atf3, CrebB-17A	Atf6	3.44177
					Activating transcription factor-2
					Jun-related antigen
					Activating transcription factor 3
					Cyclic-AMP response element binding protein B
	71	transfac_pro-M00407	V$RSRFC4_Q2	Mef2	Myocyte enhancer factor 2	3.43949
	72	transfac_public-M00026	V$RSRFC4_01	Mef2	Myocyte enhancer factor 2	3.43637
	73	yetfasco-556	YER068W			3.41657
	74	transfac_public-M00064	F$PHO4_01	Met, Mnt, tgo, Max	Methoprene-tolerant	3.40483
					Mnt
					tango
					Max
	75	homer-M00109	Mef2a(MADS)/HL1-Mef2a.biotin-ChIP-Seq/Homer/	Mef2	Myocyte enhancer factor 2	3.40344
	76	yetfasco-1153	YHL009C			3.39843
	77	swissregulon-ATF4.p2	ATF4	Atf6, Atf3, CrebB-17A	Atf6	3.39549
					Activating transcription factor 3
					Cyclic-AMP response element binding protein B
	78	transfac_pro-M00803	V$E2F_Q2	E2f, E2f2, Dp	E2F transcription factor 1	3.39326	9
					E2F transcription factor 2		3
					DP transcription factor		7
	79	yetfasco-1050	YDR081C			3.3887
	80	jaspar-MA0033.1	FOXL1	bin	biniou	3.38848
	81	transfac_pro-M01600	F$ATF1PCR1_01	Atf-2, Jra, Atf3, CrebB-17A	Activating transcription factor-2	3.38074
					Jun-related antigen
					Activating transcription factor 3
					Cyclic-AMP response element binding protein B
	82	taipale-NNCACGTGNN-MAX-DBD	NNCACGTGNN-MAX-DBD	Max, tgo, tai, Usf, Met	Max	3.3665
					tango
					taiman
					Usf
					Methoprene-tolerant
	83	transfac_pro-M03125	N$MXL3_01	Max, Mnt, tgo, Usf, Met	Max	3.36077
					Mnt
					tango
					Usf
					Methoprene-tolerant
	84	elemento-ATCAGCTG	ATCAGCTG			3.35877
	85	hdpi-USF1	USF1	Usf	Usf	3.3437
	86	flyfactorsurvey-dm_Max_SANGER_10_FBgn0017578	FBgn0017578(Max)	Max, Mnt, Usf, Met	Max	3.34114
					Mnt
					Usf
					Methoprene-tolerant
	87	transfac_public-M00232	V$MEF2_03	Mef2	Myocyte enhancer factor 2	3.33168
	88	homer-M01829	SWI6(MacIsaac)/Yeast			3.32378
	89	elemento-AACCGGTT	AACCGGTT			3.32156
	90	stark-AAAAGCT	AAAAGCT			3.31772
	91	taipale-NNRTGACGTCAYCN-CREB3-full	NNRTGACGTCAYCN-CREB3-full	Atf6, Atf-2, Jra, Atf3, CrebB-17A	Atf6	3.31594
					Activating transcription factor-2
					Jun-related antigen
					Activating transcription factor 3
					Cyclic-AMP response element binding protein B
	92	tiffin-TIFDMEM0000068	TIFDMEM0000068	Tbp	TATA binding protein	3.30309	7
	93	stark-WCACGTGC	WCACGTGC			3.29981
	94	swissregulon-MEF2_A-B-C-D_.p2	MEF2A, MEF2C, MEF2D, MEF2BNB-MEF2B, MEF2B	Mef2	Myocyte enhancer factor 2	3.2988
	95	elemento-GCGCGCC	GCGCGCC			3.29435
	96	tiffin-TIFDMEM0000062	TIFDMEM0000062			3.27956
	97	homer-M00378	Dref/dmmpmm(Bigfoot)/fly	Dref	DNA replication-related element factor	3.27794
	98	transfac_pro-M00513	V$ATF3_Q6	Jra, Atf3, CrebB-17A	Jun-related antigen	3.26827
					Activating transcription factor 3
					Cyclic-AMP response element binding protein B
	99	yetfasco-1388	YFR034C			3.25681
	100	yetfasco-1310	YPL089C			3.24818
	101	transfac_pro-M01699	F$CBF1_02	Usf, Max, Met, HLH106, Mitf, tgo	Usf	3.24401
					Max
					Methoprene-tolerant
					HLH106
					Mitf
					tango
	102	jaspar-MA0052.1	MEF2A	Mef2	Myocyte enhancer factor 2	3.22838
	103	homer-M00234	TATA-box/Drosophila-Promoters/Homer	Tbp, Taf1	TATA binding protein	3.20785
					TBP-associated factor 1		4
	104	flyfactorsurvey-Dref_FlyReg_FBgn0015664	FBgn0015664(Dref)	Dref	DNA replication-related element factor	3.20652
	105	homer-M00610	Dref/dmmpmm(Pollard)/fly	Dref	DNA replication-related element factor	3.20652
	106	stark-RCGYRCGY	Description: RCGYRCGY			3.19461
	107	transfac_public-M00516	V$E2F_03	E2f, E2f2, Dp	E2F transcription factor 1	3.18961
					E2F transcription factor 2
					DP transcription factor
	108	homer-M00160	RARg(NR)/ES-RARg-ChIP-Seq(GSE30538)/Homer	Hr4, Hr39, ftz-f1	Hr4	3.1866	3
					Hormone receptor-like in 39		3
					ftz transcription factor 1		7
	109	yetfasco-359	YFR034C	Max, gce, tgo, Usf	Max	3.17915
					germ cell-expressed bHLH-PAS
					Mnt
					Usf
	110	homer-M00016	c-Myc(HLH)/LNCAP-cMyc-ChIP-Seq/Homer	gce, Mnt, tgo, Usf, Max	germ cell-expressed bHLH-PAS	3.16124
					Mnt
					tango
					Usf
					Max
	111	homer-M00652	Top2/dmmpmm(Pollard)/fly	Top2	Topoisomerase 2	3.16046	7
	112	homer-M01788	PHO4(MacIsaac)/Yeast	Max, gce, Mnt, Usf	Max	3.14766
					germ cell-expressed bHLH-PAS
					Mnt
					Usf
	113	homer-M00226	SeqBias:			3.14577
	114	yetfasco-1551	YFR034C	Max, gce, tgo	Max	3.1446
					germ cell-expressed bHLH-PAS
					tango
	115	elemento-GTGTGACC	GTGTGACC			3.1406
	116	taipale-TSAAGGTCAN-ESRRG-full	TSAAGGTCAN-ESRRG-full	Eip78C, ERR, kni, Hr4, eg, Hr46, knrl, Hr39, ftz-f1	Ecdysone-induced protein 78C	3.13704	3
					estrogen-related receptor		3
					knirps		3
					Hr4
					eagle		7
					Hormone receptor-like in 46		3
					knirps-like		5
					Hormone receptor-like in 39
					ftz transcription factor 1
	117	yetfasco-1475	YKR034W			3.13565
	118	yetfasco-646	YFR034C	Usf, Max	Usf	3.13387
					Max
	119	flyfactorsurvey-Clk_cyc_SANGER_5_FBgn0023094	FBgn0023094(cyc)	cyc, Met, Usf, Max	cycle	3.13187
					Methoprene-tolerant
					Usf
					Max
	120	factorbook-MEF2	MEF2	Mef2	Myocyte enhancer factor 2	3.12836
	121	taipale-NNCACGTGNN-MNT-DBD	NNCACGTGNN-MNT-DBD	Max, tgo, Usf	Max	3.12836
					tango
					Usf
	122	yetfasco-2056	YER148W	Tbp	TATA binding protein	3.12408
	123	yetfasco-2009	YLR182W			3.11946
	124	stark-TGACGTCAT	TGACGTCAT	Atf-2, Jra, Atf3, CrebB-17A	Activating transcription factor-2	3.11073
					Jun-related antigen
					Activating transcription factor 3
					Cyclic-AMP response element binding protein B
	125	transfac_pro-M01809	P$RIN_01	Mef2	Myocyte enhancer factor 2	3.10494
	126	tiffin-TIFDMEM0000098	TIFDMEM0000098			3.104
	127	homer-M00102	Nr5a2(NR)/Pancreas-LRH1-ChIP-Seq(GSE34295)/Homer	Hr39, ftz-f1, ERR, Spargel	Hormone receptor-like in 39	3.10261
					ftz transcription factor 1
					estrogen-related receptor
					Spargel		7
	128	homer-M00265	Pho4(bHLH)/Yeast-Pho4-ChIP-Seq(GSE29506)/Homer	Max	Max	3.09337
	129	transfac_pro-M02897	V$SIX6_08	Optix	Optix	3.08992	9
	130	jaspar-PF0038.1	TGACCTTG	ftz-f1, ERR, Spargel	ftz transcription factor 1	3.08586
					estrogen-related receptor
					Spargel
	131	taipale-NAACCGGTTN-TFCP2-full	NAACCGGTTN-TFCP2-full	gem	gemini	3.07157	2
	132	transfac_pro-M01116	V$CLOCKBMAL_Q6	cyc, Max, Usf, Met	cycle	3.06862
					Max
					Usf
					Methoprene-tolerant
	133	tiffin-TIFDMEM0000091	TIFDMEM0000091			3.06367
	134	homer-M00110	Mef2c(MADS)/GM12878-Mef2c-ChIP-Seq(GSE32465)/Homer	Mef2	Myocyte enhancer factor 2	3.05471
	135	taipale-GATGACGTCATC-XBP1-DBD	GATGACGTCATC-XBP1-DBD	Atf-2, Jra, Atf3, CrebB-17A	Activating transcription factor-2	3.0546
					Jun-related antigen
					Activating transcription factor 3
					Cyclic-AMP response element binding protein B
	136	homer-M00048	Esrrb(NR)/mES-Esrrb-ChIP-Seq/Homer	ERR, Hr4, Hr39, Hr38, ftz-f1, Spargel	estrogen-related receptor	3.04787
					Hr4
					Hormone receptor-like in 39
					Hormone receptor-like in 38		-
					ftz transcription factor 1
					Spargel
	137	elemento-CAAGGTC	CAAGGTC	ftz-f1, ERR	ftz transcription factor 1	3.04603
					estrogen-related receptor
	138	homer-M00571	Mef2/dmmpmm(Papatsenko)/fly	Mef2	Myocyte enhancer factor 2	3.04381
	139	homer-M00270	TATA-box/SacCer-Promoters/Homer	Tbp	TATA binding protein	3.04258
	140	homer-M01523	RLM1/Literature(Harbison)/Yeast	br, Mef2	broad	3.03724	4
					Myocyte enhancer factor 2
	141	transfac_pro-M00514	V$ATF4_Q2	Atf6, Atf3, CrebB-17A	Atf6	3.0319
					Activating transcription factor 3
					Cyclic-AMP response element binding protein B
	142	stark-STATAWAWR	STATAWAWR	Tbp	TATA binding protein	3.02133
	143	jaspar-PF0028.1	CTAWWWATA	Mef2	Myocyte enhancer factor 2	3.01065
	144	taipale-TCAAGGTCAWN-ESRRB-DBD	TCAAGGTCAWN-ESRRB-DBD	Hr39, ftz-f1, ERR	Hormone receptor-like in 39	3.01026
					ftz transcription factor 1
					estrogen-related receptor
	145	transfac_pro-M02932	V$ZFP128_04			3.00915
NES>3	146	yetfasco-2164	YHR056C			3.0042

## Sheet: Cl9
	#	Motif collection	Description	Possible Transcription Factor	Possible Transcription factor - Full Name	NES	Cluster	Proliferation	Eye diff° Neurogenesis	Other	Unknown
	1	yetfasco-1444	YDL056W			4.81248
	2	transfac_pro-M01520	F$RSC30_01			4.0927
	3	yetfasco-857	YHR056C			4.0927
	4	homer-M00232	Unknown1(NR/Ini-like)/Drosophila-Promoters/Homer			4.07362
	5	homer-M00074	Gata4(Zf)/Heart-Gata4-ChIP-Seq(GSE35151)/Homer	GATAe, grn, srp, pnr, Sirt6	GATAe	4.03803	-
					grain		5
					serpent		8
					pannier		2
					Sirtuin 6		8
	6	yetfasco-1631	YER040W	grn, srp, pnr	grain	4.01427
					serpent
NES>4					pannier
	7	yetfasco-2131	YER040W	grn, pnr	grain	3.95289
					pannier
	8	transfac_pro-M00333	V$ZF5_B			3.94661
	9	transfac_public-M00456	V$FAC1_01	E(bx)	Enhancer of bithorax	3.90303	9
	10	tiffin-TIFDMEM0000116	TIFDMEM0000116			3.87831
	11	stark-RSWGAGMRHRR	RSWGAGMRHRR(Trl)	Trl, CG33260	trident	3.8408	-
					CG33260		11
	12	yetfasco-491	YFL021W	pnr	pannier	3.73669
	13	transfac_pro-M03850	V$SOX5_Q5	Sox102F	Sox102F	3.68267	4
	14	jaspar-PB0095.1	Zfp161_1			3.67393
	15	taipale-AWCAGCTGWT-TFAP4-DBD	AWCAGCTGWT-TFAP4-DBD	crp	cropped	3.66349	9
	16	transfac_pro-M03119	N$HLH11_01			3.65145
	17	jaspar-POL007.1	BREd	rn, ab, pdm3, br	rotund	3.6214	9
					abrupt		7
					pou domain motif 3		5
					broad		4
	18	transfac_pro-M03854	V$SRY_Q6	SoxN	SoxNeuro	3.59252	2
	19	flyfactorsurvey-srp_SANGER_5_FBgn0003507	FBgn0003507(srp)	grn, srp, GATAe, pnr	grain	3.57398
					GATAe
					pannier
	20	taipale-AGATAANN-GATA3-full	AGATAANN-GATA3-full	grn, srp, pnr	grain	3.55757
					serpent
					pannier
	21	swissregulon-GATA6.p2	GATA6	grn, srp, pnr, Sirt6	grain	3.5467
					serpent
					pannier
					Sirtuin 6
	22	transfac_pro-M02743	V$E2F3_03	E2f	E2F transcription factor 1	3.52134	9
	23	taipale-NAACCGGTTN-GRHL1-DBD	NAACCGGTTN-GRHL1-DBD			3.50557
	24	transfac_pro-M02328	I$ARA_01	ara	araucan (iro)	3.4963	9
	25	yetfasco-586	YJL110C	grn, srp, pnr	grain	3.49364
					serpent
					pannier
	26	taipale-AWCAGCTGWT-TFAP4-full	AWCAGCTGWT-TFAP4-full	crp	cropped	3.48469
	27	transfac_pro-M02160	P$HMG1_01			3.48021
	28	taipale-AGATAANN-GATA3-DBD	AGATAANN-GATA3-DBD	grn, srp, pnr	grain	3.47435
					serpent
					pannier
	29	yetfasco-2203	YPR104C			3.44036
	30	flyfactorsurvey-GATAe_SANGER_5_FBgn0038391	FBgn0038391(GATAe)	grn, srp, GATAe, pnr	grain	3.43865
					serpent
					GATAe
					pannier
	31	factorbook-E2F1	E2F1	E2f	E2F transcription factor	3.42757
	32	taipale-AGATAANN-GATA4-DBD	AGATAANN-GATA4-DBD	grn, srp, pnr	grain	3.42672
					serpent
					pannier
	33	homer-M00654	Trl/dmmpmm(Pollard)/fly	Trl, CG33260	trident	3.4182
					CG33260
	34	transfac_pro-M02323	I$TRL_01	Trl, CG33260	trident	3.4182
					CG33260
	35	yetfasco-2167	YOR140W	ab, pdm3, CG3407, Poxm, pad, fru, rn	abrupt	3.39497
					pou domain motif 3
					CG3407		4
					Pox meso		7
					poils au dos		4
					fruitless		7
					rotund
	36	transfac_pro-M02742	V$E2F2_03	E2f	E2F transcription factor	3.37877
	37	homer-M00696	Trl/dmmpmm(SeSiMCMC)/fly	Trl, CG33260	trident	3.37493
					CG33260
	38	transfac_pro-M01082	V$BRCA_01			3.36566
	39	flyfactorsurvey-crp_SANGER_10_FBgn0001994	FBgn0001994(crp)	crp	cropped	3.34872
	40	yetfasco-901	YDR146C			3.34776
	41	transfac_pro-M00723	I$GAGAFACTOR_Q6	Trl, CG33260	trident	3.34638
					CG33260
	42	homer-M00398	Trl/dmmpmm(Bigfoot)/fly	Trl, CG33260	trident	3.33498
					CG33260
	43	taipale-AGATAANN-GATA5-DBD	AGATAANN-GATA5-DBD	grn, srp, pnr	grain	3.33402
					serpent
					pannier
	44	tiffin-TIFDMEM0000079	TIFDMEM0000079			3.32507
	45	yetfasco-372	YNL314W	grn, pnr	grain	3.31473
					pannier
	46	yetfasco-2230	YLR403W	pdm3, CG3407, Poxm, br, pad, fru, rn	pou domain motif 3	3.31324
					CG3407
					Pox meso
					broad
					poils au dos
					fruitless
					rotund
	47	yetfasco-923	YPL202C			3.27115
	48	tiffin-TIFDMEM0000098	TIFDMEM0000098			3.26252
	49	elemento-ATCAGCTG	ATCAGCTG			3.26039
	50	homer-M00218	SeqBias:	rn, pdm3, CG3407, fru, peb	rotund	3.25229
					pou domain motif 3
					CG3407
					fruitless
					pebbled		2
	51	yetfasco-1532	YER040W	grn, srp, pnr	grain	3.24824
					serpent
					pannier
	52	hdpi-BOLL	BOLL	bol	boule	3.24525	7
	53	yetfasco-2200	YOR172W	ab, pdm3, CG3407, E2f, pad, fru, rn, E2f2	abrupt	3.22384
					pou domain motif 3
					CG3407
					E2F transcription factor
					poils au dos
					fruitless
					rotund
					E2F transcription factor 2		3
	54	elemento-AACCGGTT	AACCGGTT			3.22171
	55	yetfasco-1521	YKR034W			3.21691
	56	yetfasco-1503	YPR065W			3.19155
	57	transfac_pro-M03194	P$AT5G07580_01			3.18505
	58	tiffin-TIFDMEM0000109	TIFDMEM0000109			3.1843
	59	homer-M01476	DAL82/DAL82_SM/3-DAL82(Harbison)/Yeast	grn, pnr	grain	3.13614
					pannier
	60	transfac_pro-M03198	P$ERF2_02			3.12581
	61	transfac_pro-M01877	V$GATA2_Q5	grn, pnr	grain	3.11025
					pannier
	62	yetfasco-1760	YNL027W			3.10503
	63	transfac_public-M00348	V$GATA2_02	grn, srp, GATAe, pnr	grain	3.09661
					serpent
					GATAe
					pannier
	64	yetfasco-2175	YDL048C	ab, pdm3, CG3407, pad, fru, grn, rn	abrupt	3.09288
					pou domain motif 3
					CG3407
					poils au dos
					fruitless
					grain
					rotund
	65	transfac_pro-M02049	V$MEQ_01			3.08414
	66	homer-M00231	E-box/Drosophila-Promoters/Homer	amos, crp, nau	absent MD neurons and olfactory sensilla	3.07817	1
					cropped
					nautilus (MyoD)		6
	67	homer-M00251	DPL-1(E2F)/cElegans-Adult-ChIP-Seq(modEncode)/Homer			3.07658
	68	transfac_pro-M01879	V$HMGIY_Q4			3.07157
	69	yetfasco-2229	YDL020C	ab, pdm3, fru, E2f, vvl, pad, CG3407, rn, E2f2	abrupt	3.07008
					pou domain motif 3
					fruitless
					E2F transcription factor
					ventral veins lacking		7
					poils au dos
					CG3407
					rotund
	70	stark-MAACAA	MAACAA			3.05377
	71	stark-MAAMNNCAA	MAAMNNCAA			3.05132
	72	yetfasco-853	YDR303C			3.04717
	73	yetfasco-2172	YER148W	ab, pdm3, fru, Poxm, pad, CG3407, rn	abrupt	3.03566
					pou domain motif 3
					fruitless
					Pox meso
					poils au dos
					CG3407
					rotund
	74	transfac_pro-M03189	P$ERF1_01			3.03353
	75	elemento-AGAGAGCG	AGAGAGCG			3.0135
	76	homer-M00429	Trl/dmmpmm(Down)/fly	Trl, CG33260	trident	3.01328
					CG33260
NES>3	77	flyfactorsurvey-CG10267_SANGER_5_FBgn0037446	FBgn0037446(Zif)	Zif	Zinc-finger protein	3.00081	11

## Sheet: SbCl2A
	#	Motif collection	Description	Possible Transcription Factor	Possible Transcription factor - Full Name	NES	Cluster	Exp post MF Eye diff°	Neurogenesis	Other	Unknown
	1	taipale-NNAAAATCRATAWN-ONECUT2-DBD	NNAAAATCRATAWN-ONECUT2-DBD	ct	cut	5.74614	5
	2	taipale-NNAAAATCRATANN-ONECUT3-DBD	NNAAAATCRATANN-ONECUT3-DBD	onecut, ct	onecut	5.55348	2
					cut
	3	taipale-NNAAAATCRATAWN-ONECUT1-DBD	NNAAAATCRATAWN-ONECUT1-DBD	onecut, ct	onecut	5.21157
					cut
NES>5	4	taipale-NNAAAATCRATAWN-ONECUT1-full	NNAAAATCRATAWN-ONECUT1-full	ct	cut	5.17474
	5	flyfactorsurvey-gl_SANGER_5_FBgn0004618	FBgn0004618(gl)	gl	glass	4.56018	2
NES>4	6	flyfactorsurvey-gl_SOLEXA_5_FBgn0004618	FBgn0004618(gl)	gl	glass	4.19402
	7	swissregulon-ONECUT1-2.p2	ONECUT2, ONECUT1	onecut	onecut	3.95372
	8	yetfasco-1012	MATA1			3.78758
	9	jaspar-MA0039.1	Klf4			3.74611
	10	tiffin-TIFDMEM0000011	TIFDMEM0000011			3.60826
	11	transfac_pro-M02864	V$GM497_04			3.59517
	12	transfac_pro-M01216	V$FOXO1_Q5	slp1, slp2, foxo	sloppy paired 1	3.58706	2
					sloppy paired 2		2
					forkhead box, sub-group O		10
	13	homer-M00222	SeqBias:			3.53309
	14	tfdimers-MD00532	FOXO1_POU5F1	slp1, fkh, slp2, foxo	sloppy paired 1	3.52996
					fork head		5
					sloppy paired 2
					forkhead box, sub-group O
	15	transfac_public-M00033	V$P300_01	nej	nejire	3.48655	10
	16	yetfasco-1206	YER040W			3.46602
	17	encode-UW.Motif.0510	UW.Motif.0510			3.4482
	18	wolfe-gl_SOLEXA_F3-5	gl(FBgn0004618)			3.44406
	19	yetfasco-1308	YNL216W			3.34498
	20	yetfasco-1744	YLR131C			3.33586
	21	yetfasco-1750	YPR199C			3.31939
	22	yetfasco-1191	YPL177C			3.31677
	23	tfdimers-MD00525	GR_SMAD1			3.30233
	24	transfac_pro-M01172	V$PU1_Q4	Eip74EF	Ecdysone-induced protein 74EF	3.29861
	25	homer-M00064	FXR(NR/IR1)/Liver-FXR-ChIP-Seq/Homer	EcR	Ecdysone receptor	3.29557	7
	26	transfac_public-M00257	V$RREB1_01	peb	pebbled	3.28501	2
	27	homer-M00218	SeqBias:	rn, pdm3, CG3407, fru, peb	rotund	3.22428	9
					pou domain motif 3		5
					CG3407		4
					fruitless		7
					pebbled
	28	factorbook-TCF12	TCF12	ac, ase, ato, crp, da, amos, l(1)sc, nau, sc, cato	achaete	3.20688	3
					asense		3
					atonal		4
					cropped		9
					daughterless		9
					absent MD neurons and olfactory sensilla		1
					lethal of scute		1
					nautilus (MyoD)		6
					scute		3
					cousin of atonal		3
	29	transfac_pro-M02100	V$MYOD_Q6_02	ac, ase, CG34422, da, sc, l(1)sc, nau, amos	achaete	3.19033
					asense
					hat-trick		10
					daughterless
					scute
					lethal of scute
					nautilus (MyoD)
					absent MD neurons and olfactory sensilla
	30	transfac_public-M00184	V$MYOD_Q6	Fer1, ac, l(1)sc, sna, ato, CG34422, da, esg, ase, nau, sc, net	48 related 1	3.18577	-
					achaete
					lethal of scute
					snail		6
					atonal
					hat-trick
					daughterless
					escargot		5
					asense
					nautilus (MyoD)
					scute
					net		7
	31	swissregulon-EP300.p2	EP300	nej	nejire	3.16558
	32	yetfasco-2198	YPR015C			3.1312
	33	tfdimers-MD00603	Nkx3-2_YY1	pho, phol	pleiohomeotic	3.12926	8
					pleiohomeotic like		4
	34	jaspar-PF0016.1	RYTTCCTG	Ets65A, Eip74EF, aop	Ets at 65A	3.12124	-
					Ecdysone-induced protein 74EF
					anterior open		2
	35	homer-M00198	Tcf12(HLH)/GM12878-Tcf12-ChIP-Seq/Homer	ac, l(1)sc, da, amos, ase, nau, sc	achaete	3.1089
					lethal of scute
					daughterless
					absent MD neurons and olfactory sensilla
					asense
					nautilus (MyoD)
					scute
	36	yetfasco-1222	YLR451W			3.08948
	37	homer-M00434	z/dmmpmm(Down)/fly	z	zeste	3.07934	9
	38	yetfasco-415	YOR113W			3.07495
	39	encode-UW.Motif.0230	UW.Motif.0230			3.07115
	40	transfac_pro-M02092	V$EGR2_Q6	sr	stripe	3.06878	8
	41	homer-M00424	pan/dmmpmm(Down)/fly	pan	pangolin	3.06118	4
	42	jaspar-MA0006.1	Arnt::Ahr			3.0611
	43	homer-M01763	GCR1(MacIsaac)/Yeast			3.05231
	44	tfdimers-MD00558	POU5F1_FAC1	rn, E(bx)	rotund	3.01996
					Enhancer of bithorax		9
	45	encode-UW.Motif.0277	UW.Motif.0277			3.01591
	46	flyfactorsurvey-ttk-PA_SOLEXA_FBgn0003870	FBgn0003870(ttk)	ttk, klu	tramtrack	3.00231	3
					klumpfuss		4
NES>3	47	hdpi-LUZP1	LUZP1			3.00104

## Sheet: SbCl2B
	#	Motif collection	Description	Possible Transcription Factor	Possible Transcription factor - Full Name	NES
	1	modENCODE-POF-Larvae3rdinstar-DCC3053	modENCODE-POF-Larvae3rdinstar-DCC3053			6.94959
NES>6	2	modENCODE-POF-Larvae3rdinstar-DCC3709	modENCODE-POF-Larvae3rdinstar-DCC3709			6.14782
	3	modENCODE-HP2-Larvae3rdinstar-DCC3028	modENCODE-HP2-Larvae3rdinstar-DCC3028			5.52552
	4	modENCODE-POF-Larvae3rdinstar-DCC3795	modENCODE-POF-Larvae3rdinstar-DCC3795			5.37211
	5	GEO-GSM890119-H3K4me3-Kc.wig	GEO-GSM890119-H3K4me3-Kc.wig			5.07695
	6	GEO-GSM890120-H3K4me1-Kc.wig	GEO-GSM890120-H3K4me1-Kc.wig			5.07695
	7	GEO-GSM890121-H3K27ac-Kc.wig	GEO-GSM890121-H3K27ac-Kc.wig			5.07695
	8	GEO-GSM890122-JIL1-Kc.wig	GEO-GSM890122-JIL1-Kc.wig			5.07695
	9	GEO-GSM890123-H3K9acS10ph-Kc.wig	GEO-GSM890123-H3K9acS10ph-Kc.wig			5.07695
	10	GEO-GSM890124-H3K27acS28ph-Kc.wig	GEO-GSM890124-H3K27acS28ph-Kc.wig			5.07695
NES>5	11	modENCODE-H3K36me3-LateEmbryos-S2-DRSC-DCC303	modENCODE-H3K36me3-LateEmbryos-S2-DRSC-DCC303			5.07695
	12	encode-UW.Motif.0053	UW.Motif.0053			4.5467
	13	yetfasco-1370	YPL038W			4.49049
	14	modENCODE-H3K9ac-AdultMale-DCC832	modENCODE-H3K9ac-AdultMale-DCC832			4.38988
	15	elemento-AGAGAGAG	AGAGAGAG			4.36627
	16	yetfasco-1374	YDR253C			4.20641
NES>4	17	yetfasco-959	YPL248C			4.13865
	18	yetfasco-988	YBL008W			3.98633
	19	hdpi-INSM1	INSM1	nerfin-1, nerfin-2	nerfin-1	3.98281
					nerfin-2
	20	tiffin-TIFDMEM0000068	TIFDMEM0000068	Tbp	TATA binding protein	3.8867
	21	homer-M00263	GAGA-repeat/SacCer-Promoters/Homer	Trl, CG33260	trident	3.87415
					CG33260
	22	jaspar-MA0025.1	NFIL3	CG7786, vri, gt	CG7786	3.8473
					vrille
					giant
	23	homer-M00223	SeqBias:			3.79836
	24	yetfasco-2147	YBR089C-A			3.77252
	25	hdpi-BRUNOL5	BRUNOL5	bru-3	bruno-3	3.73788
	26	hdpi-DDX53	DDX53	CG7878	CG7878	3.73512
	27	hdpi-TGIF1	TGIF1	vis, achi	vismay	3.73462
					achintya
	28	yetfasco-556	YER068W			3.71379
	29	yetfasco-1840	YGL013C			3.68769
	30	hdpi-RBM8A	RBM8A	tsu	tsunagi	3.66912
	31	transfac_pro-M01631	F$SIG1_01			3.66661
	32	homer-M00242	GAGA-repeat/Arabidopsis-Promoters/Homer			3.64829
	33	homer-M00226	SeqBias:			3.64478
	34	tiffin-TIFDMEM0000009	TIFDMEM0000009	Trl, CG33260	trident	3.64478
					CG33260
	35	hdpi-CANX	CANX	Cnx14D, CG1924, Cnx99A	Calnexin 14D	3.63876
					CG1924
					Calnexin 99A
	36	yetfasco-2217	YBR089C-A	acj6	abnormal chemosensory jump 6	3.59559
	37	elemento-CGCACACA	CGCACACA			3.55946
	38	yetfasco-1025	YGR249W			3.55168
	39	taipale-NNAAAATCRATAWN-ONECUT1-full	NNAAAATCRATAWN-ONECUT1-full	ct	cut	3.54691
	40	transfac_pro-M02328	I$ARA_01	ara	araucan (iro)	3.53612
	41	transfac_pro-M03829	V$HNF6_Q4	onecut	onecut	3.52307
	42	homer-M00537	gt/dmmpmm(Noyes)/fly	CG7786, vri, gt	CG7786	3.51378
					vrille
					giant
	43	taipale-NNAAAATCRATAWN-ONECUT2-DBD	NNAAAATCRATAWN-ONECUT2-DBD	ct	cut	3.49998
	44	homer-M00669	br-Z3/dmmpmm(SeSiMCMC)/fly	br	broad	3.49521
	45	elemento-AAATCAAT	AAATCAAT			3.47413
	46	yetfasco-652	YPL038W			3.47388
	47	modENCODE-HP1c-Larvae3rdinstar-DCC3023	modENCODE-HP1c-Larvae3rdinstar-DCC3023			3.46382
	48	stark-CACGAGNC	CACGAGNC
	49	transfac_public-M00228	V$VBP_01	CG7786, vri, gt	CG7786	3.4267
					vrille
					giant
	50	swissregulon-FOXL1.p2	FOXL1	bin	biniou	3.42344
	51	taipale-NNAAAATCRATAWN-ONECUT1-DBD	NNAAAATCRATAWN-ONECUT1-DBD	onecut, ct	onecut	3.4129
					cut
	52	hdpi-CKMT1B	CKMT1B			3.41215
	53	transfac_pro-M00328	V$PAX8_B	sv	seven up	3.40337
	54	yetfasco-2125	YNL068C	fkh, foxo	fork head	3.39283
					forkhead box, sub-group O
	55	tfdimers-MD00439	ATF-1_HOXA13			3.3848
	56	yetfasco-688	YOR028C			3.36698
	57	transfac_pro-M01688	F$MET31_01			3.30424
	58	flyfactorsurvey-vri_SANGER_5_FBgn0016076	FBgn0016076(vri)	CG7786, vri, gt	CG7786	3.28943
					vrille
					giant
	59	yetfasco-1448	YBR182C			3.27187
	60	yetfasco-1465	YHR206W			3.2686
	61	yetfasco-2056	YER148W	Tbp	TATA binding protein	3.25932
	62	yetfasco-2216	YPR052C			3.23849
	63	yetfasco-1669	YKL062W			3.23297
	64	yetfasco-2008	YDR146C			3.22544
	65	yetfasco-2124	YIL131C	fd68A, fkh, bin, foxo	forkhead domain 68A	3.20311
					fork head
					biniou
					forkhead box, sub-group O
	66	taipale-NAASATCAAAGN-TCF7L1-full	NAASATCAAAGN-TCF7L1-full	pan, da	pangolin	3.1873
					daughterless
	67	yetfasco-2037	YBR083W			3.17826
	68	encode-UW.Motif.0591	UW.Motif.0591			3.17274
	69	yetfasco-1164	YER130C			3.17249
	70	stark-ACACNNNNRCAC	ACACNNNNRCAC			3.17224
	71	transfac_pro-M01868	V$CEBPE_Q6	slbo	slow border cells	3.16772
	72	flyfactorsurvey-klu_SANGER_10_FBgn0013469	FBgn0013469(klu)	klu, sr	klumpfuss	3.15041
					stripe
	73	encode-UW.Motif.0400	UW.Motif.0400			3.14187
	74	homer-M00830	TBP(-			3.12682
	75	flyfactorsurvey-gt_NAR_FBgn0001150	FBgn0001150(gt)	CG7786, vri, gt	CG7786	3.12657
					vrille
					giant
	76	modENCODE-HP2-Larvae3rdinstar-CME-W1-Cl.8plus-DCC3027	modENCODE-HP2-Larvae3rdinstar-CME-W1-Cl.8plus-DCC3027			3.11391
	77	homer-M00429	Trl/dmmpmm(Down)/fly	Trl, CG33260	trident	3.108
					CG33260
	78	yetfasco-1373	YDR253C			3.10724
	79	modENCODE-HP1b-Larvae3rdinstar-DCC3018	modENCODE-HP1b-Larvae3rdinstar-DCC3018			3.09013
	80	yetfasco-1260	YMR016C			3.08215
	81	swissregulon-NFIL3.p2	NFIL3	vri	vrille	3.07838
	82	transfac_pro-M01938	F$PHO4_03			3.06508
	83	yetfasco-515	YFR034C			3.06508
	84	flyfactorsurvey-Ara_SOLEXA_FBgn0015904	FBgn0015904(ara)	ara, mirr	araucan (iro)	3.05078
					mirror
	85	jaspar-MA0010.1	br_Z1	br	broad	3.04551
	86	stark-CACNNNNNNACA	CACNNNNNNACA			3.044
	87	stark-HSWAACHGH	HSWAACHGH(ovo)	ovo	ovo	3.04024
	88	homer-M01748	CIN5(MacIsaac)/Yeast			3.02895
	89	taipale-NNAAAATCRATANN-ONECUT3-DBD	NNAAAATCRATANN-ONECUT3-DBD	onecut, ct	onecut	3.02242
					cut
	90	yetfasco-1043	YKL062W			3.00887
	91	modENCODE-POF-LateEmbryos-S2-DRSC-DCC3897	modENCODE-POF-LateEmbryos-S2-DRSC-DCC3897			3.00689
	92	jaspar-SD0002.1	at_AC_acceptor			3.00536
	93	transfac_public-M00045	V$E4BP4_01	CG7786, vri, gt	CG7786	3.00435
					vrille
					giant
	94	taipale-NRTTACGTAAYN-DBP-full	NRTTACGTAAYN-DBP-full	CG7786, vri, gt	CG7786	3.0041
					vrille
NES>3					giant

## Sheet: CoreCl2
	#	Motif collection	Description	Possible Transcription Factor	Possible Transcription factor - Full Name	NES	Cluster	Exp post MF Eye diff°	Neurogenesis	Other	Unknown
	#	Feature
	1	taipale-NNAAAATCRATAWN-ONECUT2-DBD	NNAAAATCRATAWN-ONECUT2-DBD	ct	cut	7.30419	5
					onecut		2
	2	taipale-NNAAAATCRATANN-ONECUT3-DBD	NNAAAATCRATANN-ONECUT3-DBD	onecut, ct	cut	6.87567
	3	taipale-NNAAAATCRATAWN-ONECUT1-full	NNAAAATCRATAWN-ONECUT1-full	ct	cut	6.77947
	4	taipale-NNAAAATCRATAWN-ONECUT1-DBD	NNAAAATCRATAWN-ONECUT1-DBD	onecut, ct	onecut	6.77524
NES>6					cut
	5	swissregulon-ONECUT1-2.p2	ONECUT2, ONECUT1	onecut	onecut	4.59344
	6	flyfactorsurvey-gl_SANGER_5_FBgn0004618	FBgn0004618(gl)	gl	glass	4.54601	2
NES>4	7	flyfactorsurvey-gl_SOLEXA_5_FBgn0004618	FBgn0004618(gl)	gl	glass	4.18192
	8	flyfactorsurvey-lola-PG_SOLEXA_FBgn0005630	FBgn0005630(lola)	lola	longitudinals lacking	3.50055	4
	9	tiffin-TIFDMEM0000011	TIFDMEM0000011			3.48212
	10	transfac_pro-M02160	P$HMG1_01			3.43005
	11	wolfe-gl_SOLEXA_F3-5	gl(FBgn0004618)			3.42134
	12	transfac_pro-M01216	V$FOXO1_Q5	slp1, slp2, foxo	sloppy paired 1	3.35168	2
					sloppy paired 2		2
					forkhead box, sub-group O		10
	13	yetfasco-1206	YER040W			3.27814
	14	tfdimers-MD00525	GR_SMAD1			3.22031
	15	transfac_pro-M02864	V$GM497_04			3.19216
	16	yetfasco-1750	YPR199C			3.1318
	17	transfac_pro-M00639	V$HNF6_Q6	onecut	onecut	3.13155
	18	yetfasco-1214	YBL008W			3.13096
	19	encode-UW.Motif.0510	UW.Motif.0510			3.10306
	20	tiffin-TIFDMEM0000068	TIFDMEM0000068	Tbp	TATA binding protein	3.087	7
	21	yetfasco-1444	YDL056W			3.0755
	22	homer-M00222	SeqBias:			3.07499
	23	encode-UW.Motif.0053	UW.Motif.0053			3.05039
	24	homer-M00218	SeqBias:	rn, pdm3, CG3407, fru, peb	rotund	3.03399	9
					pou domain motif 3		5
					CG3407		4
					fruitless		7
					pebbled		2
	25	transfac_public-M00033	V$P300_01	nej	nejire	3.02393	10
NES>3	26	yetfasco-2147	YBR089C-A			3.01413

## Sheet: CoreCl7
	#	Motif collection	Description	Possible Transcription Factor	Possible Transcription factor - Full Name	NES	Cluster	Proliferation	Eye diff° Neurogenesis	Other	Unknown
NES>6	1	flyfactorsurvey-lola_SANGER_5_FBgn0005630	FBgn0005630(lola)	lola	longitudinals lacking	6.03957	4
	2	flyfactorsurvey-lola_SOLEXA_5_FBgn0005630	FBgn0005630(lola)	lola	longitudinals lacking	5.72199
	3	selexconsensus-Dref	Dref	Dref	DNA replication-related element factor	5.59825	7
	4	elemento-TATCGATA	TATCGATA	Dref	DNA replication-related element factor	5.54853
	5	flyfactorsurvey-lola-PG_SOLEXA_FBgn0005630	FBgn0005630(lola)	lola	longitudinals lacking	5.38882
	6	tiffin-TIFDMEM0000116	TIFDMEM0000116			5.31988
	7	homer-M00232	Unknown1(NR/Ini-like)/Drosophila-Promoters/Homer			5.29505
	8	jaspar-PF0002.1	CACGTG	Usf, Max, tgo, cyc, HLH106, Mitf, tai, Atf3	Usf	5.16942	7
					Max		7
					tango		4
					cycle		4
					Sterol regulatory element binding protein		10
					Mitf		11
					taiman		6
					Activating transcription factor 3		7
	9	yetfasco-443	YJR060W	Usf, Max, tgo, cyc, HLH106, Mitf, tai, Atf3	Usf	5.0039
					Max
					tango
					cycle
					HLH106
					Mitf
					taiman
NES>5					Activating transcription factor 3
	10	homer-M00230	DREF/Drosophila-Promoters/Homer	Dref	DNA replication-related element factor	4.90334
	11	homer-M00098	JunD(bZIP)/K562-JunD-ChIP-Seq/Homer	Atf-2, Atf3, Jra, CrebB-17A	Activating transcription factor-2	4.70479	2
					Activating transcription factor 3
					Jun-related antigen		3
					Cyclic-AMP response element binding protein B		10
	12	taipale-AWCAGCTGWT-TFAP4-full	AWCAGCTGWT-TFAP4-full	crp	cropped	4.50496	9
	13	taipale-AWCAGCTGWT-TFAP4-DBD	AWCAGCTGWT-TFAP4-DBD	crp	cropped	4.48215
	14	homer-M00097	c-Jun-CRE(bZIP)/K562-cJun-ChIP-Seq/Homer	Atf-2, Atf3, Jra, CrebB-17A	Activating transcription factor-2	4.48135
					Activating transcription factor 3
					Jun-related antigen
					Cyclic-AMP response element binding protein B
	15	tiffin-TIFDMEM0000005	TIFDMEM0000005	Dref	DNA replication-related element factor	4.4616
	16	taipale-NATGACGTCAYN-JDP2-full	NATGACGTCAYN-JDP2-full	Atf-2, Jra, Atf3, CrebB-17A	Activating transcription factor-2	4.45377
					Jun-related antigen
					Cyclic-AMP response element binding protein B
	17	tiffin-TIFDMEM0000079	TIFDMEM0000079			4.42239
	18	transfac_pro-M00488	I$DREF_Q3	Dref	DNA replication-related element factor	4.38667
	19	yetfasco-2051	YFR034C	Met, Max	Methoprene-tolerant	4.38636	4
					Max
	20	tiffin-TIFDMEM0000074	TIFDMEM0000074			4.38245
	21	taipale-NATGACGTCAYN-JDP2-DBD	NATGACGTCAYN-JDP2-DBD	Atf-2, Jra, Atf3, CrebB-17A	Activating transcription factor-2	4.38
					Jun-related antigen
					Activating transcription factor 3
					Cyclic-AMP response element binding protein B
	22	taipale-NATGACGTCAYN-Jdp2-DBD	NATGACGTCAYN-Jdp2-DBD	Atf-2, Jra, Atf3, CrebB-17A	Activating transcription factor-2	4.37431
					Jun-related antigen
					Activating transcription factor 3
					Cyclic-AMP response element binding protein B
	23	homer-M00597	BEAF-32/dmmpmm(Pollard)/fly	Dref	DNA replication-related element factor	4.2836
	24	tiffin-TIFDMEM0000042	TIFDMEM0000042			4.28005
	25	jaspar-MA0004.1	Arnt	Met, Max, tgo, Atf3, Usf	Methoprene-tolerant	4.21418
					Max
					tango
					Activating transcription factor 3
					Usf
	26	yetfasco-1389	YFR034C			4.14414
	27	factorbook-v-JUN	v-JUN	Atf-2, Atf3, Jra, CrebB-17A	Activating transcription factor-2	4.14176
					Activating transcription factor 3
					Jun-related antigen
					Cyclic-AMP response element binding protein B
	28	homer-M00676	Dref/dmmpmm(SeSiMCMC)/fly	Dref	DNA replication-related element factor	4.09282
	29	transfac_pro-M03119	N$HLH11_01			4.09282
	30	taipale-NATGACGTCAYN-Creb5-DBD	NATGACGTCAYN-Creb5-DBD	Atf-2, Jra, Atf3, CrebB-17A	Activating transcription factor-2	4.06414
					Jun-related antigen
					Activating transcription factor 3
					Cyclic-AMP response element binding protein B
	31	transfac_pro-M02772	V$JUNDM2_03	Atf6, Atf-2, Jra, Atf3, CrebB-17A	Atf6	4.00688	8
					Activating transcription factor-2
					Jun-related antigen
					Activating transcription factor 3
NES>4					Cyclic-AMP response element binding protein B
	32	yetfasco-1390	YFR034C	Max, tgo	Max	3.99226
					tango
	33	flyfactorsurvey-crp_SANGER_10_FBgn0001994	FBgn0001994(crp)	crp	cropped	3.97905
	34	transfac_pro-M00799	V$MYC_Q2	Max, tgo	Max	3.91721
					tango
	35	yetfasco-2075	YIL036W	Atf6, Atf-2, Jra, Atf3, CrebB-17A	Atf6	3.91422
					Activating transcription factor-2
					Jun-related antigen
					Activating transcription factor 3
					Cyclic-AMP response element binding protein B
	36	jaspar-PF0009.1	TGAYRTCA	Atf3, Jra, CrebB-17A	Activating transcription factor 3	3.9122
					Jun-related antigen
					Cyclic-AMP response element binding protein B
	37	hdpi-USF2	USF2	Usf	Usf	3.90761
	38	transfac_public-M00036	V$VJUN_01	Atf-2, Jra, Atf3, CrebB-17A	Activating transcription factor-2	3.89519
					Jun-related antigen
					Activating transcription factor 3
					Cyclic-AMP response element binding protein B
	39	yetfasco-247	YFR034C			3.86645
	40	yetfasco-1465	YHR206W			3.85715
	41	flyfactorsurvey-Cf2-PB_SOLEXA_FBgn0000286	FBgn0000286(Cf2)	Cf2	Chorion factor 2	3.81953	4
	42	transfac_public-M00012	I$CF2II_01	Cf2	Chorion factor 2	3.79647
	43	homer-M00236	Unknown3/Drosophila-Promoters/Homer			3.78381
	44	elemento-ACACGTG	ACACGTG	tai	taiman	3.75879
	45	tiffin-TIFDMEM0000034	TIFDMEM0000034			3.75739
	46	homer-M01514	PHO4/PHO4_Pi-/38-PHO4(Harbison)/Yeast	Max, gce, Mnt, Usf	Max	3.73745
					germ cell-expressed bHLH-PAS		7
					Mnt		3
					Usf
	47	jaspar-MA0015.1	Cf2_II	Cf2	Chorion factor 2	3.70753
	48	jaspar-MA0104.1	Mycn	Usf, E(spl)m8-HLH, Max, tgo, cyc, HLH106, Mitf, tai, Atf3	Usf	3.68344
					Enhancer of split m8, helix-loop-helix		3
					Max
					tango
					cycle
					HLH106
					Mitf
					taiman
					Activating transcription factor 3
	49	jaspar-PB0043.1	Max_1	Max, da, Mnt, tgo, Usf	tango	3.67848
					daughterless		9
					Mnt
					tango
					Usf
	50	yetfasco-580	YDR303C			3.65346
	51	taipale-NNATGACGTCATNN-ATF7-DBD	NNATGACGTCATNN-ATF7-DBD	Atf-2, Jra, Atf3, CrebB-17A	Activating transcription factor-2	3.63554
					Jun-related antigen
					Activating transcription factor 3
					Cyclic-AMP response element binding protein B
	52	swissregulon-FOXL1.p2	FOXL1	bin	biniou	3.62673	-
	53	hdpi-USF1	USF1	Usf	Usf	3.61193
	54	stark-AAAAGCT	AAAAGCT			3.60508
	55	yetfasco-297	YNL167C	Atf-2, Atf3, Jra, CrebB-17A	Activating transcription factor-2	3.59725
					Activating transcription factor 3
					Jun-related antigen
					Cyclic-AMP response element binding protein B
	56	homer-M00235	Unknown2/Drosophila-Promoters/Homer			3.59658
	57	transfac_public-M00013	I$CF2II_02	Cf2	Chorion factor 2	3.58465
	58	yetfasco-1448	YBR182C			3.5808
	59	homer-M00378	Dref/dmmpmm(Bigfoot)/fly	Dref	DNA replication-related element factor	3.57737
	60	elemento-GTGTGACC	GTGTGACC			3.57285
	61	transfac_pro-M00803	V$E2F_Q2	E2f, E2f2, Dp	E2F transcription factor 1	3.55749	9
					E2F transcription factor 2		3
					DP transcription factor		7
	62	yetfasco-1501	YPL089C	Mef2	Myocyte enhancer factor 2	3.53694	7
	63	transfac_pro-M02488	F$RLM1_02	Mef2	Myocyte enhancer factor 2	3.52838
	64	swissregulon-JUN.p2	JUN, JUND, JUNB	Atf3, Jra, CrebB-17A	Activating transcription factor 3	3.52287
					Jun-related antigen
					Cyclic-AMP response element binding protein B
	65	transfac_pro-M01699	F$CBF1_02	Usf, Max, Met, HLH106, Mitf, tgo	Usf	3.51816
					Max
					Methoprene-tolerant
					HLH106
					Mitf
					tango
	66	yetfasco-1388	YFR034C			3.50489
	67	transfac_public-M00064	F$PHO4_01	Met, Mnt, tgo, Max	Methoprene-tolerant	3.50073
					Mnt
					tango
					Max
	68	flyfactorsurvey-Dref_FlyReg_FBgn0015664	FBgn0015664(Dref)	Dref	DNA replication-related element factor	3.49015
	69	homer-M00610	Dref/dmmpmm(Pollard)/fly	Dref	DNA replication-related element factor	3.49015
	70	stark-RTATATRTRB	RTATATRTRB(Cf2)	Cf2	Chorion factor 2	3.48776
	71	yetfasco-1428	YPL089C	Mef2	Myocyte enhancer factor 2	3.48734
	72	yetfasco-1153	YHL009C			3.48409
	73	yetfasco-556	YER068W			3.48318
	74	yetfasco-1456	YER040W			3.47131
	75	taipale-NACACGTGTN-CLOCK-DBD	NACACGTGTN-CLOCK-DBD	Max	Max	3.46091
	76	taipale-NCTAWAAATAGM-MEF2D-DBD	NCTAWAAATAGM-MEF2D-DBD	Mef2	Myocyte enhancer factor 2	3.4581
	77	elemento-ATCAGCTG	ATCAGCTG			3.44831
	78	tiffin-TIFDMEM0000068	TIFDMEM0000068	Tbp	TATA binding protein	3.44623	7
	79	stark-WCACGTGC	WCACGTGC			3.4381
	80	tiffin-TIFDMEM0000062	TIFDMEM0000062			3.43485
	81	yetfasco-359	YFR034C	Max, gce, tgo, Usf	Max	3.41705
					germ cell-expressed bHLH-PAS
					tango
					Usf
	82	yetfasco-1551	YFR034C	Max, gce, tgo	Max	3.39938
					germ cell-expressed bHLH-PAS
					tango
	83	taipale-NNCACGTGNN-MAX-DBD	NNCACGTGNN-MAX-DBD	Max, tgo, tai, Usf, Met	Max	3.39179
					tango
					taiman
					Usf
					Methoprene-tolerant
	84	homer-M00231	E-box/Drosophila-Promoters/Homer	amos, crp, nau	absent MD neurons and olfactory sensilla	3.38329	1
					cropped
					nautilus (MyoD)		6
	85	homer-M00652	Top2/dmmpmm(Pollard)/fly	Top2	Topoisomerase 2	3.36353	7
	86	taipale-RCTAWAAATAGM-MEF2B-full	RCTAWAAATAGM-MEF2B-full	Mef2	Myocyte enhancer factor 2	3.36054
	87	yetfasco-1050	YDR081C			3.33839
	88	homer-M01829	SWI6(MacIsaac)/Yeast			3.33032
	89	elemento-GCGCGCC	GCGCGCC			3.32396
	90	taipale-NAACCGGTTN-TFCP2-full	NAACCGGTTN-TFCP2-full	gem	gemini	3.31436	2
	91	homer-M00226	SeqBias:			3.30121
	92	taipale-TSAAGGTCAN-ESRRG-full	TSAAGGTCAN-ESRRG-full	Eip78C, ERR, kni, Hr4, eg, Hr46, knrl, Hr39, ftz-f1	Ecdysone-induced protein 78C	3.29466	3
					estrogen-related receptor		3
					knirps		3
					Hr4		3
					eagle		7
					Hormone receptor-like in 46		3
					knirps-like		5
					Hormone receptor-like in 39		3
					ftz transcription factor 1		7
	93	homer-M00102	Nr5a2(NR)/Pancreas-LRH1-ChIP-Seq(GSE34295)/Homer	Hr39, ftz-f1, ERR, Spargel	Hormone receptor-like in 39	3.29319
					ftz transcription factor 1
					estrogen-related receptor
					Spargel		7
	94	elemento-CACGTGC	CACGTGC	E(spl)mgamma-HLH, dpn, E(spl)m8-HLH	Enhancer of split mγ, helix-loop-helix	3.2927	2
					deadpan		4
					Enhancer of split m8, helix-loop-helix
	95	jaspar-MA0033.1	FOXL1	bin	biniou	3.28432
	96	elemento-AACCGGTT	AACCGGTT			3.27961
	97	yetfasco-646	YFR034C	Usf, Max	Usf	3.27631
					Max
	98	homer-M01788	PHO4(MacIsaac)/Yeast	Max, gce, Mnt, Usf	Max	3.27558
					germ cell-expressed bHLH-PAS
					Mnt
					Usf
	99	transfac_pro-M01600	F$ATF1PCR1_01	Atf-2, Jra, Atf3, CrebB-17A	Activating transcription factor-2	3.2738
					Jun-related antigen
					Activating transcription factor 3
					Cyclic-AMP response element binding protein B
	100	homer-M00234	TATA-box/Drosophila-Promoters/Homer	Tbp, Taf1	TATA binding protein	3.25649
					TBP-associated factor 1		4
	101	homer-M00008	Atf1(bZIP)/K562-ATF1-ChIP-Seq(GSE31477)/Homer	Atf6, Atf-2, Jra, Atf3, CrebB-17A	Atf6	3.24273
					Activating transcription factor-2
					Jun-related antigen
					Activating transcription factor 3
					Cyclic-AMP response element binding protein B
	102	homer-M00048	Esrrb(NR)/mES-Esrrb-ChIP-Seq/Homer	ERR, Hr4, Hr39, Hr38, ftz-f1, Spargel	estrogen-related receptor	3.23637
					Hr4
					Hormone receptor-like in 39
					Hormone receptor-like in 38		-
					ftz transcription factor 1
					Spargel
	103	stark-RCGYRCGY	RCGYRCGY			3.23086
	104	homer-M00016	c-Myc(HLH)/LNCAP-cMyc-ChIP-Seq/Homer	gce, Mnt, tgo, Usf, Max	germ cell-expressed bHLH-PAS	3.22151
					Mnt
					tango
					Usf
					Max
	105	flyfactorsurvey-dm_Max_SANGER_10_FBgn0017578	FBgn0017578(Max)	Max, Mnt, Usf, Met	Max	3.20572
					Mnt
					Usf
					Methoprene-tolerant
	106	taipale-NAAACCGGTTTN-GRHL1-full	NAAACCGGTTTN-GRHL1-full			3.18487
	107	yetfasco-2056	YER148W	Tbp	TATA binding protein	3.17624
	108	transfac_public-M00516	V$E2F_03	E2f, E2f2, Dp	E2F transcription factor	3.17386
					DP transcription factor
	109	flyfactorsurvey-Met_SANGER_5_FBgn0002723	FBgn0002723(Met)	cyc, Met, tgo, tai, Max	cycle	3.1697
					Methoprene-tolerant
					tango
					taiman
					Max
	110	tiffin-TIFDMEM0000098	TIFDMEM0000098			3.16352
	111	transfac_pro-M02738	V$ATF1_03	Atf6, Atf-2, Jra, Atf3, CrebB-17A	Atf6	3.16107
					Activating transcription factor-2
					Jun-related antigen
					Activating transcription factor 3
					Cyclic-AMP response element binding protein B
	112	taipale-NTCAAGGTCAN-ESRRA-DBD	NTCAAGGTCAN-ESRRA-DBD	Hr4, Hr39, ftz-f1, ERR, Spargel	Hr4	3.15795
					Hormone receptor-like in 39
					ftz transcription factor 1
					estrogen-related receptor
					Spargel
	113	jaspar-PF0038.1	TGACCTTG	ftz-f1, ERR, Spargel	ftz transcription factor 1	3.14358
					estrogen-related receptor
					Spargel
	114	taipale-NNRTGACGTCAYCN-CREB3-full	NNRTGACGTCAYCN-CREB3-full	Atf6, Atf-2, Jra, Atf3, CrebB-17A	Atf6	3.14346
					Activating transcription factor-2
					Jun-related antigen
					Activating transcription factor 3
					Cyclic-AMP response element binding protein B
	115	taipale-NNCACGTGNN-MNT-DBD	NNCACGTGNN-MNT-DBD	Max, tgo, Usf	Max	3.13887
					tango
					Usf
	116	transfac_pro-M03125	N$MXL3_01	Max, Mnt, tgo, Usf, Met	Max	3.13807
					Mnt
					tango
					Usf
					Methoprene-tolerant
	117	taipale-KCTAWAAATAGM-MEF2A-DBD	KCTAWAAATAGM-MEF2A-DBD	Mef2	Myocyte enhancer factor 2	3.13349
	118	flyfactorsurvey-Clk_cyc_SANGER_5_FBgn0023094	FBgn0023094(cyc)	cyc, Met, Usf, Max	cycle	3.13141
					Methoprene-tolerant
					Usf
					Max
	119	tiffin-TIFDMEM0000091	TIFDMEM0000091			3.12211
	120	taipale-TCAAGGTCAWN-ESRRB-DBD	TCAAGGTCAWN-ESRRB-DBD	Hr39, ftz-f1, ERR	Hormone receptor-like in 39	3.11324
					ftz transcription factor 1
					estrogen-related receptor
	121	flyfactorsurvey-Max_Mnt_SANGER_5_FBgn0023215	FBgn0023215(Mnt)	Max, Mnt, Usf	Max	3.10639
					Mnt
					Usf
	122	transfac_pro-M01116	V$CLOCKBMAL_Q6	cyc, Max, Usf, Met	cycle	3.09917
					Max
					Usf
					Methoprene-tolerant
	123	transfac_pro-M01132	V$SF1_Q6_01	Hr39, ftz-f1, ERR, Spargel	Hormone receptor-like in 39	3.08822
					ftz transcription factor 1
					estrogen-related receptor
					Spargel
	124	homer-M00109	Mef2a(MADS)/HL1-Mef2a.biotin-ChIP-Seq/Homer/	Mef2	Myocyte enhancer factor 2	3.08027
	125	yetfasco-2009	YLR182W			3.06871
	126	transfac_pro-M00920	V$E2F_Q6_01	E2f, E2f2, Dp	E2F transcription factor 1	3.06467
					E2F transcription factor 2
					DP transcription factor
	127	homer-M00265	Pho4(bHLH)/Yeast-Pho4-ChIP-Seq(GSE29506)/Homer	Max	Max	3.06198
	128	stark-TGACGTCAT	TGACGTCAT	Atf-2, Jra, Atf3, CrebB-17A	Activating transcription factor-2	3.0596
					Jun-related antigen
					Activating transcription factor 3
					Cyclic-AMP response element binding protein B
	129	hdpi-TFEB	TFEB	Mitf, Usf, tgo, Max	Mitf	3.0544
					Usf
					tango
					Max
	130	elemento-CAAGGTC	CAAGGTC	ftz-f1, ERR	ftz transcription factor 1	3.05366
					estrogen-related receptor
	131	homer-M00160	RARg(NR)/ES-RARg-ChIP-Seq(GSE30538)/Homer	Hr4, Hr39, ftz-f1	Hr4	3.03354
					Hormone receptor-like in 39
					ftz transcription factor 1
	132	homer-M01789	MBP1(MacIsaac)/Yeast			3.02314
	133	taipale-TTTTCCCGCCAAAW-E2F7-DBD	TTTTCCCGCCAAAW-E2F7-DBD			3.02265
	134	yetfasco-700	YLR182W			3.02008
	135	swissregulon-MEF2_A-B-C-D_.p2	MEF2A, MEF2C, MEF2D, MEF2BNB-MEF2B, MEF2B	Mef2	Myocyte enhancer factor 2	3.01996
	136	swissregulon-ESRRA.p2	ESRRA	Hr4, Hr39, ftz-f1, ERR, Spargel	Hr4	3.01274
					Hormone receptor-like in 39
					ftz transcription factor 1
					estrogen-related receptor
					Spargel
NES>3	137	transfac_pro-M01809	P$RIN_01	Mef2	Myocyte enhancer factor 2	3.00406

## Sheet: CoreCl9
	#	Motif collection	Description	Possible Transcription Factor	Possible Transcription factor - Full Name	NES	Cluster	Proliferation	Eye diff° Neurogenesis	Other	Unknown
	1	homer-M00696	Trl/dmmpmm(SeSiMCMC)/fly	Trl, CG33260	trident	4.62912	-
					CG33260		11
	2	transfac_pro-M00723	I$GAGAFACTOR_Q6	Trl, CG33260	trident	4.57403
					CG33260
	3	homer-M00398	Trl/dmmpmm(Bigfoot)/fly	Trl, CG33260	trident	4.56578
					CG33260
	4	homer-M00654	Trl/dmmpmm(Pollard)/fly	Trl, CG33260	trident	4.4068
					CG33260
	5	transfac_pro-M02323	I$TRL_01	Trl, CG33260	trident	4.4068
					CG33260
	6	homer-M00218	SeqBias:	rn, pdm3, CG3407, fru, peb	rotund	4.40535	9
					pou domain motif 3		5
					CG3407		4
					fruitless		7
					pebbled		2
	7	homer-M00429	Trl/dmmpmm(Down)/fly	Trl, CG33260	trident	4.37501
					CG33260
	8	homer-M00242	GAGA-repeat/Arabidopsis-Promoters/Homer			4.32744
	9	hdpi-YWHAZ	YWHAZ	14-3-3zeta	14-3-3zeta	4.18448	7
	10	stark-RSWGAGMRHRR	RSWGAGMRHRR(Trl)	Trl, CG33260	trident	4.14807
					CG33260
	11	elemento-AGAGAGCG	AGAGAGCG			4.14152
	12	transfac_pro-M01082	V$BRCA_01			4.04274
NES>4	13	tfdimers-MD00435	Helios A_Pax-4			4.02041
	14	transfac_pro-M02006	V$GATA5_Q4	pnr	pannier	3.93546	2
	15	homer-M00434	z/dmmpmm(Down)/fly	z	zeste	3.92163	9
	16	elemento-AGAGAGAG	AGAGAGAG			3.91192
	17	hdpi-BOLL	BOLL	bol	boule	3.69518	7
	18	encode-UW.Motif.0053	UW.Motif.0053			3.62601
	19	encode-UW.Motif.0040	UW.Motif.0040			3.61946
	20	elemento-CTCTCTC	CTCTCTC			3.56436
	21	stark-GAGAGAG	GAGAGAG			3.56436
	22	homer-M00356	Su(H)/dmmpmm(Bergman)/fly			3.56193
	23	transfac_public-M00076	V$GATA2_01	grn	grain	3.53232	5
	24	transfac_public-M00077	V$GATA3_01	grn	grain	3.51363
	25	transfac_public-M00456	V$FAC1_01	E(bx)	Enhancer of bithorax	3.47796	9
	26	stark-MAACAA	MAACAA			3.46631
	27	homer-M00404	z/dmmpmm(Bigfoot)/fly	z	zeste	3.44349
	28	swissregulon-ZFP161.p2	ZFP161			3.44276
	29	transfac_pro-M03850	V$SOX5_Q5	Sox102F	Sox102F	3.38403	3
	30	transfac_pro-M02901	V$SOX13_04	sc, ac, ase, l(1)sc, Sox102F	scute	3.31413	3
					achaete		3
					asense		3
					lethal of scute		1
					Sox102F
	31	transfac_pro-M01814	V$AML2_Q3	RunxB, run, RunxA, lz	RunxB	3.30952	-
					runt		4
					RunxA		-
					lozenge		2
	32	transfac_pro-M02160	P$HMG1_01			3.27675
	33	jaspar-MA0037.1	GATA3	grn	grain	3.26704
	34	transfac_pro-M02874	V$IRF6_04			3.21971
	35	yetfasco-1745	YDR216W			3.21535
	36	yetfasco-539	YER040W			3.21146
	37	jaspar-POL005.1	DPE			3.202
	38	yetfasco-1497	YOR032C	HLH106	Sterol regulatory element binding protein	3.17263	10
	39	jaspar-POL007.1	BREd	rn, ab, pdm3, br	rotund	3.1338
					abrupt		7
					pou domain motif 3
					broad		4
	40	homer-M00263	GAGA-repeat/SacCer-Promoters/Homer	Trl, CG33260	trident	3.13355
					CG33260
	41	encode-UW.Motif.0606	UW.Motif.0606			3.11705
	42	transfac_pro-M00333	V$ZF5_B			3.11656
	43	transfac_pro-M00789	V$GATA_Q6	grn, pnr	grain	3.10977
					pannier
	44	transfac_pro-M02856	V$FOXK1_04	fd68A, Aef1, CG4360	Forkhead box K	3.10491	9
					Adult enhancer factor 1		2
					CG4360		1
	45	flyfactorsurvey-Cf2-PA_SOLEXA_FBgn0000286	FBgn0000286(Cf2)	Cf2	Chorion factor 2	3.05516	4
	46	transfac_pro-M01877	V$GATA2_Q5	grn, pnr	grain	3.052
					pannier
	47	transfac_pro-M01520	F$RSC30_01			3.03671
	48	yetfasco-857	YHR056C			3.03671
	49	taipale-AATGGCGCCAAA-E2F1-DBD	AATGGCGCCAAA-E2F1-DBD	E2f	E2F transcription factor	3.02676	9
	50	elemento-AACCGGTT	AACCGGTT			3.02094
	51	yetfasco-2141	YGR249W			3.01778
NES>3	52	jaspar-PB0095.1	Zfp161_1			3.00662

## Sheet: AllClusters
Cluster 2		Sub-cluster 2		Core 2			Cluster 7		Core 7			Cluster 9		Core Cluster 9
cut	NES>6	cut		cut			longitudinals lacking		longitudinals lacking	NES>6		GATAe (-)		trident
onecut	NES>5	onecut	NES>5	onecut	NES>6		DNA replication-related element factor	NES>5	DNA replication-related element factor			grain		CG33260
glass	NES>4	glass	NES>4	glass	NES>4		Usf		Usf			serpent		rotund
trident (-)		sloppy paired 1		longitudinals lacking			Max		Max			pannier		pou domain motif 3
CG33260		sloppy paired 2		sloppy paired 1			tango		tango			Sirtuin 6	NES>4	CG3407
sloppy paired 1		forkhead box, sub-group O		sloppy paired 2			cycle		cycle			Enhancer of bithorax		fruitless
sloppy paired 2		fork head		forkhead box, sub-group O			Sterol regulatory element binding protein		Sterol regulatory element binding protein			trident		pebbled
forkhead box, sub-group O		nejire		TATA binding protein			Mitf		Mitf			CG33260		14-3-3zeta	NES>4
rotund		Ecdysone-induced protein 74EF		rotund			taiman		taiman			Sox102F		pannier
pou domain motif 3		Ecdysone receptor		pou domain motif 3			Activating transcription factor 3		Activating transcription factor 3	NES>5		cropped		zeste
CG3407		pebbled		CG3407			cropped		Activating transcription factor-2			rotund		boule
fruitless		rotund		fruitless			Activating transcription factor-2		Jun-related antigen			abrupt		grain
pebbled		pou domain motif 3		pebbled			Jun-related antigen		Cyclic-AMP response element binding protein B			pou domain motif 3		Enhancer of bithorax
achaete		CG3407		nejire	NES>3		Cyclic-AMP response element binding protein B		cropped			broad		Sox102F
asense		fruitless					Atf6		Methoprene-tolerant			SoxNeuro		scute
atonal		achaete					Methoprene-tolerant	NES>4	Atf6	NES>4		E2F transcription factor		achaete
cropped		asense					Myocyte enhancer factor 2		Chorion factor 2			araucan (iro)		asense
daughterless		atonal					Chorion factor 2		germ cell-expressed bHLH-PAS			CG3407		lethal of scute
absent MD neurons and olfactory sensilla		cropped					absent MD neurons and olfactory sensilla		Mnt			Pox meso		RunxB
lethal of scute		daughterless					nautilus (MyoD)		Enhancer of split m8, helix-loop-helix			poils au dos		runt
nautilus (MyoD)		absent MD neurons and olfactory sensilla					daughterless		daughterless			fruitless		RunxA
scute		lethal of scute					Mnt		biniou (-)			pebbled		lozenge
cousin of atonal		nautilus (MyoD)					germ cell-expressed bHLH-PAS		E2F transcription factor 1			boule		Sterol regulatory element binding protein
pangolin		scute					biniou (-)		E2F transcription factor 2			absent MD neurons and olfactory sensilla		abrupt
Ets at 65A (-)		cousin of atonal					Enhancer of split m8, helix-loop-helix		DP transcription factor			nautilus (MyoD)		broad
Ecdysone-induced protein 74EF		hat-trick					E2F transcription factor 1		Myocyte enhancer factor 2			ventral veins lacking		Forkhead box K
anterior open		48 related 1 (-)					E2F transcription factor 2		TATA binding protein			Zinc-finger protein	NES>3	Adult enhancer factor 1
stripe		snail					DP transcription factor		absent MD neurons and olfactory sensilla					CG4360
Enhancer of bithorax		escargot					TATA binding protein		nautilus (MyoD)					Chorion factor 2
SoxNeuro		net					TBP-associated factor 1		Topoisomerase 2					E2F transcription factor	NES>3
fork head		pleiohomeotic					Hr4		gemini
hat-trick	NES>3	pleiohomeotic like					Hormone receptor-like in 39		Ecdysone-induced protein 78C
		Ets at 65A (-)					ftz transcription factor 1		estrogen-related receptor
		anterior open					Topoisomerase 2		knirps
		zeste					Ecdysone-induced protein 78C		Hr4
		stripe					estrogen-related receptor		eagle
		pangolin					knirps		Hormone receptor-like in 46
		Enhancer of bithorax					eagle		knirps-like
		tramtrack					Hormone receptor-like in 46		Hormone receptor-like in 39
		klumpfuss	NES>3				knirps-like		ftz transcription factor 1
							Spargel		Spargel
							Optix		Enhancer of split mγ, helix-loop-helix
							gemini		deadpan
							Hormone receptor-like in 38 (-)		TBP-associated factor 1
							broad	NES>3	Hormone receptor-like in 38 (-)	NES>3

## Sheet: ClusterRegulation
Cluster 2		823	1029	948	860	616	1606	1753	1005	705	867	681							Cluster 7																Cluster	Count of Cluster		Cluster 9
		Cl1	Cl2	Cl3	Cl4	Cl5	Cl6	Cl7	Cl8	Cl9	Cl10	Cl11	not found								Cl1	Cl2	Cl3	Cl4	Cl5	Cl6	Cl7	Cl8	Cl9	Cl10	Cl11	not found			1	1				Cl1	Cl2	Cl3	Cl4	Cl5	Cl6	Cl7	Cl8	Cl9	Cl10
																																			2	2
Nb TF / Cl		29	75	53	111	60	22	66	56	86	48	20		626					Nb TF / Cl		29	75	53	111	60	22	66	56	86	48	20		626		3	10		Nb TF / Cl		29	75	53	111	60	22	66	56	86	48
		3.52369	7.28863	5.59072	12.907	9.74026	1.36986	3.76497	5.57214	12.1986	5.53633	2.93686									4.63259	11.9808	8.46645	17.7316	9.58466	3.51438	10.5431	8.94569	13.738	7.66773	3.19489				4	7				4.63259	11.9808	8.46645	17.7316	9.58466	3.51438	10.5431	8.94569	13.738	7.66773
		4.63259	11.9808	8.46645	17.7316	9.58466	3.51438	10.5431	8.94569	13.738	7.66773	3.19489							Nt RE		1	2	10	7	1	2	12	1	4	2	1	2	45		5	1		Nt RE		1	3	0	4	2	1	5	2	5	0
Nt RE		2	7	4	3	3	1	1	2	4	2	1	2	32		Cluster	Count of Cluster				2.22222	4.44444	22.2222	15.5556	2.22222	4.44444	26.6667	2.22222	8.88889	4.44444	2.22222				6	2				3.7037	11.1111	0	14.8148	7.40741	3.7037	18.5185	7.40741	18.5185	0
		6.25	21.875	12.5	9.375	9.375	3.125	3.125	6.25	12.5	6.25	3.125				1	2				0.479693	0.370963	2.62474	0.877277	0.231852	1.26465	2.52929	0.248413	0.647028	0.57963	0.695556				7	12				0.799489	0.927407	0	0.835502	0.77284	1.05387	1.75645	0.828042	1.34798	0
		1.34914	1.82583	1.47642	0.528716	0.978125	0.889205	0.296402	0.698661	0.909884	0.815104	0.978125				2	6																		8	1
																3	5		% relative to nb TF		3.44828	2.66667	18.8679	6.30631	1.66667	9.09091	18.1818	1.78571	4.65116	4.16667	5				9	4		% relative to nb TF		3.44828	4	0	3.6036	3.33333	4.54545	7.57576	3.57143	5.81395	0
% relative to nb TF		6.89655	9.33333	7.54717	2.7027	5	4.54545	1.51515	3.57143	4.65116	4.16667	5				4	5																		10	3
																5	4																		11	1
SubCluster 2																6	2																		-	2
		Cl1	Cl2	Cl3	Cl4	Cl5	Cl6	Cl7	Cl8	Cl9	Cl10	Cl11	not found			7	3																		(empty)
																8	2																		Total Result	46
Nb TF / Cl		29	75	53	111	60	22	66	56	86	48	20		626		9	5																					Core Cluster 9
		4.63259	11.9808	8.46645	17.7316	9.58466	3.51438	10.5431	8.94569	13.738	7.66773	3.19489				10	3																							Cl1	Cl2	Cl3	Cl4	Cl5	Cl6	Cl7	Cl8	Cl9	Cl10
Nt RE		2	6	5	5	4	2	2	2	5	3	0	2	38		-	2		Core Cl7																Cluster	Count of Cluster
		5.26316	15.7895	13.1579	13.1579	10.5263	5.26316	5.26316	5.26316	13.1579	7.89474	0				(empty)					Cl1	Cl2	Cl3	Cl4	Cl5	Cl6	Cl7	Cl8	Cl9	Cl10	Cl11	not found			1	1		Nb TF / Cl		29	75	53	111	60	22	66	56	86	48
		1.13612	1.31789	1.55412	0.742058	1.09825	1.49761	0.499203	0.588346	0.957772	1.02961	0				Total Result	39																		2	3				4.63259	11.9808	8.46645	17.7316	9.58466	3.51438	10.5431	8.94569	13.738	7.66773
																			Nb TF / Cl		29	75	53	111	60	22	66	56	86	48	20		626		3	10		Nt RE		2	4	3	5	2	0	4	0	5	1
% relative to nb TF		6.89655	8	9.43396	4.5045	6.66667	9.09091	3.0303	3.57143	5.81395	6.25	0									4.63259	11.9808	8.46645	17.7316	9.58466	3.51438	10.5431	8.94569	13.738	7.66773	3.19489				4	7				4.44444	8.88889	6.66667	11.1111	4.44444	0	8.88889	0	11.1111	2.22222
																			Nt RE		1	3	10	7	1	2	12	1	3	2	1	2	45		5	1				0.959387	0.741926	0.787421	0.626627	0.463704	0	0.843098	0	0.808786	0.289815
Core 2																Cluster	Count of Cluster				2.22222	6.66667	22.2222	15.5556	2.22222	4.44444	26.6667	2.22222	6.66667	4.44444	2.22222				6	2
		Cl1	Cl2	Cl3	Cl4	Cl5	Cl6	Cl7	Cl8	Cl9	Cl10	Cl11	not found			2	5				0.479693	0.556444	2.62474	0.877277	0.231852	1.26465	2.52929	0.248413	0.485271	0.57963	0.695556				7	12		% relative to nb TF		6.89655	5.33333	5.66038	4.5045	3.33333	0	6.06061	0	5.81395	2.08333
																4	2																		8	1
Nb TF / Cl		29	75	53	111	60	22	66	56	86	48	20		626		5	2		% relative to nb TF		3.44828	4	18.8679	6.30631	1.66667	9.09091	18.1818	1.78571	3.48837	4.16667	5				9	3
		4.63259	11.9808	8.46645	17.7316	9.58466	3.51438	10.5431	8.94569	13.738	7.66773	3.19489				7	2																		10	2
Nt RE		0	5	0	2	2	0	2	0	1	2	0	0	14		9	1																		11	1
		0	35.7143	0	14.2857	14.2857	0	14.2857	0	7.14286	14.2857	0				10	2																		-	2
		0	2.98095	0	0.805663	1.49048	0	1.35498	0	0.519934	1.8631	0				(empty)																			(empty)
																Total Result	14																		Total Result	45
% relative to nb TF		0	6.66667	0	1.8018	3.33333	0	3.0303	0	1.16279	4.16667	0
[truncated: 5 more columns]
